# Behavioral evidence for nested central pattern generator control of *Drosophila* grooming

Primoz Ravbar, Neil Zhang, Julie H. Simpson

Department of Molecular Cellular and Developmental Biology and Neuroscience Research Institute,  
University of California Santa Barbara

Corresponding authors: [primoz.ravbar@gmail.com](mailto:primoz.ravbar@gmail.com) and [jhsimpson@ucsb.edu](mailto:jhsimpson@ucsb.edu)

## 1 Abstract

2  
3 Central pattern generators (CPGs) are neurons or neural circuits that produce periodic output without  
4 requiring patterned input. More complex behaviors can be assembled from simpler subroutines, and  
5 nested CPGs have been proposed to coordinate their repetitive elements, simplifying control over  
6 different time-scales. Here, we use behavioral experiments to establish that *Drosophila* grooming may  
7 be controlled by nested CPGs. On the short time-scale (5-7 Hz), flies execute periodic leg sweeps and  
8 rubs. More surprisingly, transitions between bouts of head cleaning and leg rubbing are also periodic on  
9 a longer time-scale (0.3 - 0.6 Hz). We examine grooming at a range of temperatures to show that the  
10 frequencies of both oscillations increase – a hallmark of CPG control – and also that the two time-scales  
11 increase at the same rate, indicating that the nested CPGs may be linked. This relationship also holds  
12 when sensory drive is held constant using optogenetic activation, but the rhythms decouple in  
13 spontaneously grooming flies, showing that alternative control modes are possible. Nested CPGs  
14 simplify generation of complex but repetitive behaviors, and identifying them in *Drosophila* grooming  
15 presents an opportunity to map the neural circuits that constitute them.

## 18 Introduction

19  
20 Animals combine simpler movements into complex routines, forming behaviors with organization  
21 across multiple time-scales. For example, a California spiny lobster explores its olfactory environment  
22 by waving different segments of its antenna with different frequencies: slow and broad oscillations  
23 originating from the base allow the antenna to cover a large space around the animal. The next segment  
24 oscillates a little faster, ensuring optimal sampling for local exploration, and the most distal segments,  
25 where the sensory organs are located, oscillate fastest, adding fine granularity to the lobster's olfactory  
26 image of the world (Ravbar, field observations). How is this complex behavior assembled from simpler  
27 movements in such a harmonious manner?

28  
29 Central pattern generators (CPGs) are neural circuits that produce rhythmic motor outputs in response to  
30 a trigger without requiring ongoing descending drive or patterned sensory inputs (Hooper & Büschges,  
31 2017). CPGs control short stereotypic actions in cat walking, crayfish swimming, locust flight, leech  
32 heartbeat, and the stomatogastric and pyloric rhythms of crustaceans (reviewed in (Berkowitz, 2019;  
33 Grillner, 2006; Marder & Calabrese, 1996; Mulloney & Smarandache, 2010; Selverston, 2010)).  
34 However, CPGs may also contribute to control more complex behaviors. When the movements that  
35 compose a behavior repeat, it is inefficient to execute each step with a separate decision. Automating

36 the sequence by calling its actions in series produces reliable control. Increasingly complex sequences  
37 can be assembled from shorter elements, suggesting hierarchical control. When repetitive subroutines  
38 are themselves composed of simpler periodic movements, it has been suggested that they may be  
39 controlled by nested CPGs, hierarchically organized so that a “high-level” slow CPG controls the  
40 behavior on coarse scale and a “lower-level” fast CPG adds the fine structure (Berkowitz, 2019). In  
41 other words, the slow CPG controls alternations *between* subroutines and the fast CPG controls  
42 alternations *within* these subroutines. Various combinations of coarse and fine oscillators could produce  
43 behaviors of arbitrary complexity while still keeping them well-timed, stereotyped, and coherent. Bird  
44 song, for example, contains sound syllables executed in sequences. The syllables are short repeating  
45 elements, and sequences of syllables make phrases or words that also repeat, creating structure over  
46 several time-scales. Ingenious local cooling experiments of specific brain regions cause the whole song  
47 to slow down, indicating that it is governed by central pattern generating circuits (Long & Fee, 2008).

48  
49 Here we show that *Drosophila* grooming behavior contains patterned elements over several time-scales:  
50 a fast repeat of individual leg movements (sweeps or rubs) and a slow alternation between bouts of head  
51 cleaning and front leg rubbing. We demonstrate that both of these repeated elements show evidence of  
52 CPG control, and that the two rhythms are usually coordinated, establishing fly grooming as a model  
53 system for understanding the circuit architecture of nested CPGs.

## 54 55 56 **Results**

### 57 58 **Two time-scales of grooming are periodic**

59 When flies are covered in dust, they initially groom anterior body parts using their front legs (Seeds et  
60 al., 2014). They alternate between series of head sweeps, where the legs move synchronously, and bouts  
61 of leg rubbing, where the legs move in opposition to each other, scraping the dust off. These movements  
62 are shown schematically in **Figure 1A**: the purple and orange arrows indicate parallel and anti-parallel  
63 leg movements and the thicker blue arrow shows the alternation between those leg coordination modes.  
64 Bouts of head cleaning (h) are indicated in purple and front leg rubbing (f) in orange on the ethogram  
65 (record of behavior actions over time) shown in **Figure 1B**.

66  
67 The individual leg sweeps and rubs are stereotyped: the repeated bouts of these movements are  
68 recognizable by human observers or machine vision algorithms (Ravbar, Branson, & Simpson, 2019),  
69 and they represent the short time-scale we consider here. We can count individual leg movements from  
70 raw videos (see Methods) and thus compute their frequencies. In **Figure 1C** we show an example of  
71 frequencies of leg sweeps and rubs during the same period as **Figure 1A-B**. We demonstrate their  
72 periodicity using autocorrelation analysis (**Figure 1F and G**). At 18°C, as shown here, leg rubs and  
73 sweeps have a characteristic frequency ~6Hz. This means that each complete leg movement takes  
74 approximately 150 msec to complete, which is consistent with our unpublished observations using  
75 higher resolution camera recordings. The periodicity of the short time-scale leg sweep and rub  
76 movements suggests that they are produced by central pattern generating circuits, a hypothesis we will  
77 test further below.

78  
79 Grooming is not a fixed action pattern and flies choose subroutines such as anterior grooming or wing  
80 cleaning stochastically, but with different levels of prioritization (Seeds et al., 2014). They typically  
81 make several head sweeps in a row, followed by repeated leg rubbing movements; we call these chunks

82 of repeated actions *bouts*. We use our Automatic Behavior Recognition System (ABRS; (Ravbar et al.,  
83 2019)) to automatically classify different grooming actions and to identify the time-points of maximum  
84 confidence as the centers of bouts (orange and purple circles in **Figure 1D**). Head cleaning bouts and  
85 front leg rubbing bouts alternate, and we define the time between two head cleaning bouts as an *hh-cycle*  
86 while the time between two consecutive front leg rubbing bouts is an *ff-cycle*. These terms are illustrated  
87 in **Figure 1E**, and cycles are the long time-scale we investigate here.

88  
89 Although previous work revealed some syntactic organization at the bout level – both identity and  
90 duration of current action influence the identity and duration of the next (Mueller, Ravbar, Simpson, &  
91 Carlson, 2019) - we were surprised to find that the alternation of head cleaning and front leg rubbing  
92 bouts is periodic. Autocorrelation analysis of the *ff*-cycles shown in **Figure 1H** demonstrates signal at  
93 ~0.45 Hz, corresponding to approximately 2 seconds between the mid-point of consecutive bouts of  
94 front leg rubbing. Similar periodicity is observed for *hh*-cycles (data not shown.)

95  
96 The discovery that both short time-scale and long time-scale subroutines within grooming behavior  
97 show periodicity suggests the possibility that they may both be controlled by central pattern generating  
98 circuits. The proposal that nested CPGs simplify the control of repetitive motor sequences (Berkowitz,  
99 2019) is an appealing framework to explain rhythmicity in complex behaviors such as grooming that  
100 occur on multiple time-scales. We now consider the response of these rhythms to increasing temperature  
101 as additional evidence that central pattern generators govern both time-scales, and to determine whether  
102 the two levels of the proposed nested CPGs are independent or interlocked.

103  
104

### 105 **The period lengths of both time-scales contract with increasing temperature**

106 A key feature of central pattern generators is that they oscillate faster at higher temperatures (Deliagina,  
107 Orlovsky, & Pavlova, 1983; Tang et al., 2010). To determine whether temperature affects periodicity of  
108 leg sweeps and rubs (short time-scale) or the alternation between bouts of head sweeps and leg rubs (*ff*-  
109 cycles; long time-scale), we recorded the grooming behavior of dust-covered flies at a range of  
110 temperatures between 18 and 30°C. Example ethograms from the extreme temperatures are shown in  
111 **Figure 2A**, and the entire dataset arranged from coolest to warmest temperature is displayed in **Figure**  
112 **2B**. This represents 84 individual flies at seven temperatures recorded for 13 minutes each.

113

114 Temperature increase causes faster individual leg movements (**Figure 2C-E**) in both sweeps and rubs  
115 (**Supplementary Figure 1**). The oscillation remains periodic (**Supplementary Figure 2**), and the  
116 frequency of leg movements across temperatures shows a linear increase from 5.8Hz to 6.8Hz ( $R^2=0.99$ ,  
117  $p<0.001$ ) (**Figure 2D-E**). When we examine how the autocorrelations change with time  
118 (**Supplementary Figure 3**) we observe rich structure, on at least the short time-scale (x-axis) and the  
119 long time-scale (y-axis), that contracts with temperature in both dimensions.

120

121 Crucially, the period of long time-scale movements is also compressed by temperature. The *ff*-cycle  
122 frequency increases from 0.45Hz at 18°C to 0.53Hz at 30°C, also in a linear manner ( $p<0.001$ ,  $R^2=0.98$ ;  
123 **Figure 2F-H**). The frequencies of *hh*-cycles show a very similar trend (**Supplementary Figure 4**). This  
124 result suggests that CPGs may be involved in the generation of the long time-scale alternations. The  
125 autocorrelations for the long time-scale are more variable, and the behavior is more ragged at higher  
126 temperature (**Supplementary Figure 2D**). This is consistent with previous evidence in other models

127 that central pattern generators are less stable at elevated temperature (Alonso & Marder, 2020; Rinberg,  
128 Taylor, & Marder, 2013).

129  
130 Increasing temperature shortens the cycle period of both the short time-scale leg sweeps and rubs and  
131 the long time-scale alternation between bouts of head cleaning and front leg rubbing, corroborating the  
132 hypothesis that both time-scales are controlled by two levels of nested CPGs. Now we ask whether  
133 these two time-scales contract together (at the same rate), which would suggest a mechanistic linkage  
134 between the two levels.

135

136

### 137 **Two time-scales contract together, suggesting connections between nested CPGs**

138 Several metrics indicate that the short and long time-scales contract at the same rate as temperature  
139 increases, suggesting that their control mechanisms are linked. We noticed that the number of leg  
140 movements within a ff-cycle is fairly consistent (average ~12). **Figure 3A** demonstrates that this  
141 average number of leg movements holds, even as the speed ff-cycles increases with temperature: at  
142 18°C, there are 12 leg movements of 170 msec for a ff-cycle duration of 2.17 seconds, while at 30°C  
143 there are 12 leg movements of 148 msec for a ff-cycle duration of 1.89 seconds. Thus, the average  
144 number of leg movements per ff-cycle remains the same across all temperatures (**Figure 3B**), supporting  
145 the hypothesis that the two levels of nested CPGs controlling the short and long time-scales are linked.

146

147 An alternative way to determine whether the two time-scales scale together with temperature is to plot  
148 their contraction *rates*. By normalizing by their minimal frequencies, we can visualize the slope of  
149 temperature dependence for each time-scale: the correlation is striking ( $p < 0.002$ ,  $R^2 = 0.94$ ; **Figure 3C**).  
150 Both time-scales contract at the same rate, with  $R^2$  values of 0.96 and 0.93, respectively. Similar trends  
151 can be seen for hh-cycles (**Supplementary Figure 5**). Together these data support the hypothesis that  
152 the short time-scale leg movements and the long time-scale alternations between anterior grooming  
153 subroutines are controlled by two levels of nested central pattern generating circuits.

154

155

### 156 **Periodicity and correlation between time-scales persist when sensory stimulation is constant**

157 So far, we have shown that two hallmarks of CPGs – periodicity and temperature-dependent frequency  
158 increase – hold for both short time-scale leg sweeps or rubs and long time-scale alternations between leg  
159 rubbing and head cleaning subroutines. An additional criterion for determining if a behavior is  
160 controlled by a CPG is that rhythmic output does not require rhythmic or patterned input. When flies are  
161 covered in dust, their grooming actions alter the sensory input. The faster their legs sweep, the more  
162 quickly dust is removed. Perhaps the coupling between time-scales can be explained because faster leg  
163 sweeps result in more dust removal, which reduces sensory drive and thus shortens grooming bouts. In  
164 other words, the rhythmic behavioral output could result in similarly rhythmic sensory input - thus not  
165 excluding the reflex chain explanation of the observed periodicity (Marder & Bucher, 2001). What  
166 happens to the periodicity of long time-scale, across temperatures, if the sensory drive is held constant?  
167 We predict that if the long time-scale is indeed CPG-controlled, it should contract with increasing  
168 temperature even when we hold the sensory input constant. We test this using optogenetic activation of  
169 all mechanosensory bristle neurons.

170

171 We previously demonstrated that this manipulation induces grooming, beginning with the anterior body  
172 parts, and alternating between bouts of head cleaning and front leg rubbing (Hampel, McKellar,  
173 Simpson, & Seeds, 2017; Zhang, Guo, & Simpson, 2020). Here, we combine optogenetic activation for

174 constant sensory input with temperature control to show that both individual leg movements and bout-  
175 level alternations increase in a correlated manner. Representative ethograms at 18° and 30°C show  
176 characteristic alternation between bouts of head cleaning and front leg rubbing (**Figure 4A**). The entire  
177 dataset of optogenetically-induced grooming over a range of temperatures is shown in **Figure 4B**.  
178 Uniform sensory input evokes rhythmic output at both short and long time-scales (long time-scale  
179 shown in **Supplementary Figure 6**) and the period of these rhythms gets shorter with temperature  
180 (**Figure 4C-H**). The frequency of ff-cycles increases significantly ( $R^2 = 0.82$ ,  $p=0.02$ ) with temperature  
181 and leg movement frequencies increase somewhat less ( $R^2 = 0.70$ ,  $p=0.08$ , respectively). The  
182 frequencies are similar to dust-induced grooming and the average number of leg movements per ff-cycle  
183 is also similarly preserved across the range of temperatures (**Figure 4I-J**). As with dusted flies, the rate  
184 of contraction of the two time-scale is correlated (**Figure 4K**), supporting the hypothesis that the short  
185 time-scale leg movements and the long time-scale bout alternations are both controlled by CPGs, and  
186 that these circuits are yoked together.

187  
188 Optogenetic stimulation of mechanosensory neurons does not precisely mimic the physical stimulus of  
189 dust itself, and the response of the optogenetically manipulated flies to temperature reflects this. Both  
190 short and long time-scale behaviors occur with somewhat shorter periodicity at lower temperature than  
191 their dust-evoked counterparts and stop increasing beyond 26-28° C (compare **Figures 2E, H** and **4E,**  
192 **H**). One possible explanation is that the optogenetic stimulation is “maxing out” the sensory input: it  
193 may be driving the fastest leg movements biomechanically possible, or the upper bound of the CPG’s  
194 frequency range may be reached at a lower temperature. Starting from the higher frequency baseline,  
195 the two time-scales still increase with temperature at similar rates (**Figure 4K**).

### 196 197 198 **Nested CPGs can be decoupled in spontaneously grooming flies**

199 Flies groom robustly in response to dust or optogenetically-controlled mechanosensory stimulation, but  
200 they also groom spontaneously. The leg movements they perform are recognizable sweeps and rubs, and  
201 they occasionally produce alternating bouts of head cleaning and front leg rubbing as well (**Figure 5A,**  
202 **B**). These flies have no sensory stimuli except what they generate themselves by contact between their  
203 legs and bodies, so any motor patterns may be coordinated by internal circuits. We analyzed the  
204 temperature response of both time-scales of grooming movements in spontaneously grooming flies.

205  
206 Although these flies groom less than dusted or optogenetically-activated flies, they show characteristic  
207 sweep and rub frequencies that increase with temperature, with higher variance (5.5Hz to 7.2Hz; **Figure**  
208 **5B, D-F**). The ff-cycles are rarer, and when they occur, the temperature-dependent contraction is much  
209 less pronounced (**Figure 5C, G, and H**). Although the number of leg movements per ff-cycle is similar  
210 to stimulated flies (~14; with higher variation across the temperature range, **Figure 5I, J**), the correlated  
211 temperature-dependent contraction of the short and long time-scale observed in the dusted and  
212 optogenetically activated flies is not seen in the spontaneously grooming ones (compare **Figure 5K** to  
213 **Figures 3K** and **4K**). Leg rubs and sweeps increase with temperature at a greater rate than ff and hh-  
214 cycles (**Figure 5K**), suggesting that the pattern-generating circuits that control the two time-scales of  
215 movements can be dissociated in spontaneous grooming. Perhaps some aspects of grooming, namely  
216 the bouts of head cleaning or front leg rubbing, can be either driven rhythmically by a high-level CPG  
217 (as they seem to be in stimulated flies) or initiated individually in a less patterned way, in spontaneously  
218 grooming flies.

219

220

## 221 **Discussion**

222

223 Temperature manipulations have been instrumental in identifying behaviors controlled by central pattern  
224 generators and for locating where those circuits reside. Robust rhythms are retained across a range of  
225 temperatures in the stomatogastric ganglia, where the relative timing of events is preserved even as the  
226 sequence itself changes speeds (Alonso & Marder, 2020; Rinberg et al., 2013; Tang, Taylor, Rinberg, &  
227 Marder, 2012). Local cooling of the cat spinal cord demonstrated which segments contain locomotion  
228 control circuits (Deliagina, Orlovsky, & Pavlova, 1983), and local warming showed that cricket chirping  
229 is governed by thoracic rather than brain ganglia (Pires & Hoy, 1992a, 1992b). The role of CPGs in bird  
230 song, and the importance of the HVC brain region for sequence duration, was shown because local  
231 cooling expands the entire song without changing the relative timing of the syllable components  
232 (Armstrong & Abarbanel, 2016; Long & Fee, 2008). Here, we examine fly grooming behavior at  
233 different temperatures to demonstrate that both its short and long time-scale components show evidences  
234 of CPG control.

235

236 Fly grooming is an innate motor sequence with both repetition and flexibility. Behavior analysis has  
237 shown organization over several time-scales, from single stereotyped leg movements, to alternation  
238 between bouts of repeated actions targeting a specific body part (Mueller, Ravbar, Simpson, & Carlson,  
239 2019), to a gradual and probabilistic progression from anterior toward posterior grooming (Seeds et al.,  
240 2014). Here we investigate what aspects of fly grooming are periodic, demonstrating that the short time-  
241 scale leg sweeps and rubs repeat at characteristic frequencies, in the absence of patterned sensory input,  
242 and in a temperature-dependent manner (**Figures 2-5**), consistent with control by a central pattern  
243 generator. Since the neural circuits that constitute the CPGs that control these periodic leg movements  
244 are likely to overlap with those proposed to coordinate walking (Bidaye, Bockemuhl, & Buschges,  
245 2018), this was expected.

246

247 But our more surprising discovery was that the alternation between bouts of head cleaning and front leg  
248 rubbing is also periodic. While this oscillation is more variable, it too, is: (1) independent of patterned  
249 sensory input, and (2) it increases in frequency with temperature (**Figures 2-5**) – strongly suggesting  
250 that there may be an additional CPG circuit operating at this longer time-scale. Thus, this high-level,  
251 overarching, CPG can control the alternations between leg rubs and sweeps that are themselves  
252 governed by a faster, low-level CPG. The concept of multiple CPGs to coordinate movements is not  
253 new. CPGs may control each leg joint, regulating the interaction between flexor and extensor muscles,  
254 controlling the way coxa-trochanter and femur-tibia joints are coordinated to produce forward or  
255 backward walking, or mediating interactions among limbs (Feng et al., 2020; Mantziaris, Bockemuhl, &  
256 Buschges, 2020). In the vertebrate spinal cord, inhibitory and excitatory commissural neurons can cause  
257 the CPGs controlling the legs to synchronize for a hopping gait or operate out-of-phase for walking  
258 (Kiehn, 2016). This concept of nested CPGs has recently been extended to explain flexible coordination  
259 of behaviors ranging from fish swimming to bird song (Berkowitz, 2019). In a recent publication, a very  
260 similar nested CPG to the one we are proposing here has been described in the crab stomatogastric  
261 ganglion where fast pyloric and slow gastric mill rhythms are coupled (Powell, Haddad, Gorur-  
262 Shandilya, & Marder, 2020). We map fly grooming behavior into this framework in **Figure 6**.

263

264 The combination of two rhythmic behaviors raises the possibility that the governing circuits interact,  
265 like meshed gears of different sizes, to simplify control of a repetitive behavior or to compensate for

266 temperature changes. Just as the relative number of rotations between different gears is the same  
267 regardless of the absolute speed of the mechanism, so is the phase of different components of CPGs  
268 conserved across a range of temperatures (Marder & Bucher, 2001). And in the case of fly grooming this  
269 relationship between fast and slow components of the system may be reflected in the conserved number  
270 of leg movements in a grooming bout across a range of temperatures (**Figure 3, Figure 4 I-K,**  
271 **Supplementary Figure 5**). But the neural circuit implementation of nested CPGs, and the “clutch”  
272 mechanisms that engage and disengage their connections, has not yet been determined.  
273

274 Dust-induced grooming can be routine, rhythmic, repetitive, governed by central pattern generators, but  
275 spontaneous grooming may have different control architecture. Fast walking insects may be more likely  
276 to engage CPGs, while slower ones may rely more on sensory feedback and reflex chains (Mantziaris,  
277 Bockemuhl, & Buschges, 2020). Just as you can walk a straight path without thinking about it or you  
278 can carefully place each foot on icy terrain, flies may have alternative ways to produce grooming.  
279 Disturbing a single bristle elicits a single directed leg sweep (Kays, Cvetkovska, & Chen, 2014;  
280 Vandervorst & Ghysen, 1980), while covering the fly in dust evokes an entire grooming program with  
281 bouts of several leg sweeps and rubs, the alternations between the bouts and gradual progression from  
282 mostly anterior to mostly posterior behaviors (Phillis et al., 1993; Seeds et al., 2014). So our observation  
283 that spontaneous grooming does not show strong periodicity of the long time-scale can be interpreted as  
284 effective decoupling of the two levels of the nested CPG in those flies that engage in more sporadic and  
285 shorter episodes of grooming behaviors.  
286

287 The specific neural circuits that constitute CPGs have been challenging to identify in most preparations  
288 and even the best characterized would benefit from more comparators. The electrophysiological  
289 recordings that have been so critical in CPG analysis in other preparations are possible but challenging  
290 in *Drosophila*, but the real strength of the system is the ability to demonstrate that specific neurons have  
291 a causal connection to rhythm generation. New anatomical resources to map neural circuits, especially  
292 the complete electron microscopy dataset covering the ventral nerve cord (Maniates-Selvin et al., 2020),  
293 will enable identification of the pre-motor neurons most likely to participate in CPGs and the  
294 commissural connections that may mediate among them. Functional imaging on neural activity in  
295 dissected, fictively moving preparations (Pulver et al., 2015) and even in behaving flies (Chen et al.,  
296 2018) is another promising approach to identify neurons with rhythmic activity that many constitute  
297 parts of the central pattern generators. The genetically encoded calcium indicators and new voltage  
298 indicators have fast enough onset and offset kinetics to capture rhythmicity on the expected time-scales  
299 (Simpson & Looger, 2018). Rhythmic activity and circuit connectivity may suggest candidate neurons;  
300 the genetic tools to target specific neurons (Jenett et al., 2012) and the optogenetic methods to impose  
301 altered activity patterns (Klapoetke et al., 2014) presents a way to causally connect specific neurons to  
302 control of rhythmic behaviors.  
303

304 The behavioral evidence presented here suggests that nested CPGs can control aspects of fly grooming.  
305 The leg rubbing and bout alternations usually scale together in respond to temperature but can decouple  
306 in spontaneous grooming. Identifying what circuits constitute these central pattern generators and  
307 mapping the neurons that coordinate their interactions to produce fly grooming is feasible, now that we  
308 know we ought to be looking for them.  
309

310

## 311 **Acknowledgements**

312 We thank members of the Simpson, Louis, and Kim labs for feedback, and especially Li Guo and Dr.  
313 Josh Mueller for excellent suggestions.

314

315

## 316 **Methods**

317

### 318 **Fly stocks and husbandry**

319 *Drosophila melanogaster* were reared on common cornmeal food in a 25°C incubator on a 12 hr  
320 light/dark cycle. 3-5 days CantonS males were used for dusting and spontaneous grooming experiments.  
321 For optogenetic experiments, larvae were raised on normal food. After eclosion, 1-day old adults were  
322 transferred into food containing 0.4 mM all-trans-retinal and reared in the dark for another two days.  
323 R74C07-GAL4 (attp2) was obtained from Bloomington Stock Center (Bloomington, IN).

324

### 325 **Behavior experiments with temperature control**

326 Behavior videos were recorded inside New Brunswick I2400 incubator shaker or DigiTherm DT2-MP-  
327 47L heating/cooling incubator. Experiments were performed every 2°C between 18°C and 30°C.  
328 Temperature was monitored by a Govee H5072 Bluetooth thermometer. For dusting experiments, the  
329 room temperature was also adjusted to target temperature to make sure flies stay at the same temperature  
330 during fly dusting. Each fly was tested once in one condition. Three chambers were used in fly dusting  
331 assay: dusting chamber (24 well corning tissue culture plate #3524), transfer chamber and recording  
332 chamber. Flies were anesthetized on ice and transferred to the middle four wells of the transfer chamber.  
333 Transfer chamber with flies was then kept in the incubator set to the target temperature for 15 min. For  
334 fly dusting, around 5 mg Reactive Yellow 86 dust was added into each of the 4 middle wells of the  
335 dusting chamber. Transfer chamber was aligned with the dusting chamber. Flies were tapped into the  
336 dusting chamber and shaken for 10 times. After dusting, flies and dust were transferred back into the  
337 transfer chamber. Transfer chamber was banged against an empty pipette tip box to remove extra dust.  
338 Dusted flies were then immediately tapped into the recording chamber for video recording. The whole  
339 dusting process was performed in a Misonix WS-6 downflow hood.

340

341 For optogenetics and spontaneous grooming experiments, ice-anesthetized flies were put into the  
342 recording chamber directly. Recording chamber with flies was then kept in the incubator set to the target  
343 temperature for 15 min before experiment. In spontaneous grooming experiments, flies were shaken for  
344 5 times after the 15 min incubation. They were then rested in the incubator for another 3 minutes before  
345 recording.

346

347 60 Hz videos were recorded for 9 min in optogenetics experiments, 13 min in dusting and spontaneous  
348 grooming experiments with a FLIR Blackfly S USB 3 camera. Infrared backlight was used for all  
349 experiments. Custom-made LED panels (LXM2-PD01-0050, 625nm) were used for optogenetic  
350 activation from below. 20 Hz 20% light duty cycle was used in optogenetics experiments. Red light  
351 intensity was adjusted to 0.85 mW/cm<sup>2</sup>.

352

### 353 **Leg movements counting from video**

354 Regions of interest were cropped around the animals to produce 80x80 arrays of pixels (**F**). The **F** arrays  
355 were reshaped into 1600 rows and 30 rows, corresponding to 30 consecutive frames (1 sec window),  
356 were stacked together to obtain 30x1600 array of pixel values (**W**).



357  
358  
359  
360  
361  
362  
363  
364  
365  
366  
367  
368  
369  
370  
371  
372  
373  
374  
375  
376  
377  
378  
379  
380  
381  
382  
383  
384  
385  
386  
387  
388  
389  
390  
391  
392  
393  
394  
395  
396  
397  
398  
399  
400  
401  
402

The derivatives of **W** across time were computed using `Numpy.gradient()` function to obtain matrix of frame-to-frame differences **D**. The matrix **D** was smoothed using Gaussian filter (`scipy.ndimage.filters.gaussian_filter`). This was done to denoise the signal - to remove non-biological high frequency changes.

All the values of **D** where cumulative change of pixel values was less than threshold ( $\theta = 5.0$ ) were converted to zeros to retain only those pixels where significant movement occurred.

Peaks of significant changes, corresponding to animal movements were found using `scipy.signal.find_peaks()` function on the matrix **D**. The number of peaks is assumed to be the number of leg sweeps that occurred in the time window (.5 sec). This was justified because only the frames where grooming behavior was detected were considered for leg sweep counting. The number of leg movements per second was used as the leg movement frequency.

### **Automatic behavior recognition from videos**

Probabilities and ethograms of grooming behaviors were extracted from raw videos using Automatic Behavior Recognition System (ABRS). For detailed description see (Ravbar et al., 2019) and for the most updated version see ABRS (<https://github.com/AutomaticBehaviorRecognitionSystem/ABRS>)

Briefly, ABRS pre-processes video data by compressing it into spatio-temporal features in the form of 3-channel space-time images (3CST images, shape=80 x 80 x 3) where the first channel [0] contains raw video frame pixel values [80x80], the second channel [1] contains spectral features of pixel value dynamics over a time-window of 16 frames, and the third channel [2] contains frame-to-frame difference (frame subtraction). The 3CST images are classified into 7 behavioral categories (front leg rubbing, head cleaning, back leg rubbing, abdominal cleaning, wing cleaning and whole-body movements (walking)) by ConvNet (Covolutional Neural Network - CNN) implemented in Tensor Flow, (in Python) (<https://www.tensorflow.org>) using a model trained with diverse set of videos of fly grooming behaviors. In the final output layer of the CNN are the probabilities of the grooming behaviors. In this work we focus entirely on the probabilities of front leg rubbing and head cleaning behaviors:  $P(f)$  and  $P(h)$ .

### **Behavioral confidence**

The long time-scale oscillations are quantified as probabilities of behaviors obtained from the ABRS CNN described above. Behavioral confidence is computed as:

$$BC = P(f) - P(h) \quad \text{Eq. 1}$$

### **Autocorrelation analysis**

Autocorrelation functions (ACFs) were computed from a 0.5 sec time-window for individual leg movements (leg rubs and sweeps). The signal for autocorrelation was extracted from raw movies as follows: 1) Matrix **D** was obtained as described above (Leg movements counting from video); 2) ACFs were computed for every column of **D**; and 3) All the ACFs were averaged to obtain the mean ACF for that time-window. The mean ACFs were stacked to obtain the ACF array with dimensions 60 x F, where F is the number of frames in the movie. The AFCs were computed using `scipy.signal.correlate` function from SciPy library.

403 Autocorrelation functions (ACFs) for the long time-scale (the oscillations between bouts of leg rubbing  
404 and head cleaning) were computed from the behavioral confidence (BC) time-traces described in Eq.1,  
405 in the time-window of 999 frames (16.6 sec), also using the `scipy.signal.correlate` function.

406

### 407 **Frequency computations for the long time-scales**

408 Behavioral confidence (BC) traces were used to compute the frequencies of the long time-scale.

409

$$410 \quad f = 1/L \quad \text{Eq.2}$$

411

412 In Eq. 2 the L is a vector containing the lengths of periods measured from the BC traces. The periods  
413 were measured either between two peaks of the BC traces (ff-cycles) or between two valleys (hh-cycles)  
414 (also see **Figure 1E** for illustration). This produced a vector of frequencies of dimensions  $1 \times F$ , where F  
415 is the number of frames in a movie, corresponding to one fly. The mean and median frequencies for each  
416 fly were computed as means/medians of vector  $f$ .

417

### 418 **Handling of outliers and missing data points**

419

420 We found and did not eliminate an outlier in optogenetically stimulated flies (leg movement frequencies  
421 at 20°C). In cases where there were missing data points (no fly was in the recording chamber), those  
422 were not counted in the statistics.

423

424

425

## 426 **References**

427

428 Alonso, L. M., & Marder, E. (2020). Temperature compensation in a small rhythmic circuit. *Elife*, 9.

429 doi:10.7554/eLife.55470

430 Armstrong, E., & Abarbanel, H. D. (2016). Model of the songbird nucleus HVC as a network of central

431 pattern generators. *J Neurophysiol*, 116(5), 2405-2419. doi:10.1152/jn.00438.2016

432 Berkowitz, A. (2019). Expanding our horizons: central pattern generation in the context of complex

433 activity sequences. *J Exp Biol*, 222(Pt 20). doi:10.1242/jeb.192054

434 Bidaye, S. S., Bockemuhl, T., & Buschges, A. (2018). Six-legged walking in insects: how CPGs,

435 peripheral feedback, and descending signals generate coordinated and adaptive motor rhythms. *J*

436 *Neurophysiol*, 119(2), 459-475. doi:10.1152/jn.00658.2017

437 Chen, C. L., Hermans, L., Viswanathan, M. C., Fortun, D., Aymanns, F., Unser, M., . . . Ramdya, P.

438 (2018). Imaging neural activity in the ventral nerve cord of behaving adult *Drosophila*. *Nat*

439 *Commun*, 9(1), 4390. doi:10.1038/s41467-018-06857-z

440 Deliagina, T. G., Orlovsky, G. N., & Pavlova, G. A. (1983). The capacity for generation of rhythmic

441 oscillations is distributed in the lumbosacral spinal cord of the cat. *Exp Brain Res*, 53(1), 81-90.

442 doi:10.1007/BF00239400

443 Feng, K., Sen, R., Minegishi, R., Dübbert, M., Bockemühl, T., Büschges, A., & Dickson, B. J. (2020).

444 Distributed control of motor circuits for backward walking in *Drosophila*. *bioRxiv*,

445 2020.2007.2011.198663. doi:10.1101/2020.07.11.198663

446 Grillner, S. (2006). Biological pattern generation: the cellular and computational logic of networks in

447 motion. *Neuron*, 52(5), 751-766. doi:10.1016/j.neuron.2006.11.008

- 448 Hampel, S., McKellar, C. E., Simpson, J. H., & Seeds, A. M. (2017). Simultaneous activation of parallel  
449 sensory pathways promotes a grooming sequence in *Drosophila*. *Elife*, *6*.  
450 doi:10.7554/eLife.28804
- 451 Jenett, A., Rubin, G. M., Ngo, T. T., Shepherd, D., Murphy, C., Dionne, H., . . . Zugates, C. T. (2012). A  
452 GAL4-driver line resource for *Drosophila* neurobiology. *Cell Rep*, *2*(4), 991-1001.  
453 doi:10.1016/j.celrep.2012.09.011
- 454 Kays, I., Cvetkovska, V., & Chen, B. E. (2014). Structural and functional analysis of single neurons to  
455 correlate synaptic connectivity with grooming behavior. *Nat Protoc*, *9*(1), 1-10.  
456 doi:10.1038/nprot.2013.157
- 457 Kiehn, O. (2016). Decoding the organization of spinal circuits that control locomotion. *Nat Rev*  
458 *Neurosci*, *17*(4), 224-238. doi:10.1038/nrn.2016.9
- 459 Klapoetke, N. C., Murata, Y., Kim, S. S., Pulver, S. R., Birdsey-Benson, A., Cho, Y. K., . . . Boyden, E.  
460 S. (2014). Independent optical excitation of distinct neural populations. *Nat Methods*, *11*(3), 338-  
461 346. doi:10.1038/nmeth.2836
- 462 Long, M. A., & Fee, M. S. (2008). Using temperature to analyse temporal dynamics in the songbird  
463 motor pathway. *Nature*, *456*(7219), 189-194. doi:10.1038/nature07448
- 464 Maniates-Selvin, J. T., Hildebrand, D. G. C., Graham, B. J., Kuan, A. T., Thomas, L. A., Nguyen, T., . . .  
465 Lee, W.-C. A. (2020). Reconstruction of motor control circuits in adult *Drosophila* using  
466 automated transmission electron microscopy. *bioRxiv*, 2020.2001.2010.902478.  
467 doi:10.1101/2020.01.10.902478
- 468 Mantziaris, C., Bockemuhl, T., & Buschges, A. (2020). Central pattern generating networks in insect  
469 locomotion. *Dev Neurobiol*, *80*(1-2), 16-30. doi:10.1002/dneu.22738
- 470 Marder, E., & Calabrese, R. L. (1996). Principles of rhythmic motor pattern generation. *Physiol Rev*,  
471 *76*(3), 687-717. doi:10.1152/physrev.1996.76.3.687
- 472 Mueller, J. M., Ravbar, P., Simpson, J. H., & Carlson, J. M. (2019). *Drosophila melanogaster* grooming  
473 possesses syntax with distinct rules at different temporal scales. *PLoS Comput Biol*, *15*(6),  
474 e1007105. doi:10.1371/journal.pcbi.1007105
- 475 Mulloney, B., & Smarandache, C. (2010). Fifty Years of CPGs: Two Neuroethological Papers that  
476 Shaped the Course of Neuroscience. *Front Behav Neurosci*, *4*. doi:10.3389/fnbeh.2010.00045
- 477 Phillis, R. W., Bramlage, A. T., Wotus, C., Whittaker, A., Gramates, L. S., Seppala, D., . . . Murphey, R.  
478 K. (1993). Isolation of mutations affecting neural circuitry required for grooming behavior in  
479 *Drosophila melanogaster*. *Genetics*, *133*(3), 581-592. Retrieved from  
480 <https://www.ncbi.nlm.nih.gov/pubmed/8454205>
- 481 Pires, A., & Hoy, R. R. (1992a). Temperature coupling in cricket acoustic communication. I. Field and  
482 laboratory studies of temperature effects on calling song production and recognition in *Gryllus*  
483 *firmus*. *J Comp Physiol A*, *171*(1), 69-78. doi:10.1007/BF00195962
- 484 Pires, A., & Hoy, R. R. (1992b). Temperature coupling in cricket acoustic communication. II.  
485 Localization of temperature effects on song production and recognition networks in *Gryllus*  
486 *firmus*. *J Comp Physiol A*, *171*(1), 79-92. doi:10.1007/BF00195963
- 487 Powell, D. J., Haddad, S. A., Gorur-Shandilya, S., & Marder, E. (2020). Coupling between fast and slow  
488 oscillator circuits in *Cancer borealis* is temperature compensated. *bioRxiv*,  
489 2020.2006.2026.173427. doi:10.1101/2020.06.26.173427
- 490 Pulver, S. R., Bayley, T. G., Taylor, A. L., Berni, J., Bate, M., & Hedwig, B. (2015). Imaging fictive  
491 locomotor patterns in larval *Drosophila*. *J Neurophysiol*, *114*(5), 2564-2577.  
492 doi:10.1152/jn.00731.2015

- 493 Ravbar, P., Branson, K., & Simpson, J. H. (2019). An automatic behavior recognition system classifies  
494 animal behaviors using movements and their temporal context. *J Neurosci Methods*, 326,  
495 108352. doi:10.1016/j.jneumeth.2019.108352
- 496 Rinberg, A., Taylor, A. L., & Marder, E. (2013). The effects of temperature on the stability of a neuronal  
497 oscillator. *PLoS Comput Biol*, 9(1), e1002857. doi:10.1371/journal.pcbi.1002857
- 498 Seeds, A. M., Ravbar, P., Chung, P., Hampel, S., Midgley, F. M., Jr., Mensh, B. D., & Simpson, J. H.  
499 (2014). A suppression hierarchy among competing motor programs drives sequential grooming  
500 in *Drosophila*. *Elife*, 3, e02951. doi:10.7554/eLife.02951
- 501 Selverston, A. I. (2010). Invertebrate central pattern generator circuits. *Philos Trans R Soc Lond B Biol*  
502 *Sci*, 365(1551), 2329-2345. doi:10.1098/rstb.2009.0270
- 503 Simpson, J. H., & Looger, L. L. (2018). Functional Imaging and Optogenetics in *Drosophila*. *Genetics*,  
504 208(4), 1291-1309. doi:10.1534/genetics.117.300228
- 505 Tang, L. S., Taylor, A. L., Rinberg, A., & Marder, E. (2012). Robustness of a rhythmic circuit to short-  
506 and long-term temperature changes. *J Neurosci*, 32(29), 10075-10085.  
507 doi:10.1523/JNEUROSCI.1443-12.2012
- 508 Vandervorst, P., & Ghysen, A. (1980). Genetic control of sensory connections in *Drosophila*. *Nature*,  
509 286(5768), 65-67. doi:10.1038/286065a0
- 510 Zhang, N., Guo, L., & Simpson, J. H. (2020). Spatial Comparisons of Mechanosensory Information  
511 Govern the Grooming Sequence in *Drosophila*. *Curr Biol*, 30(6), 988-1001 e1004.  
512 doi:10.1016/j.cub.2020.01.045  
513

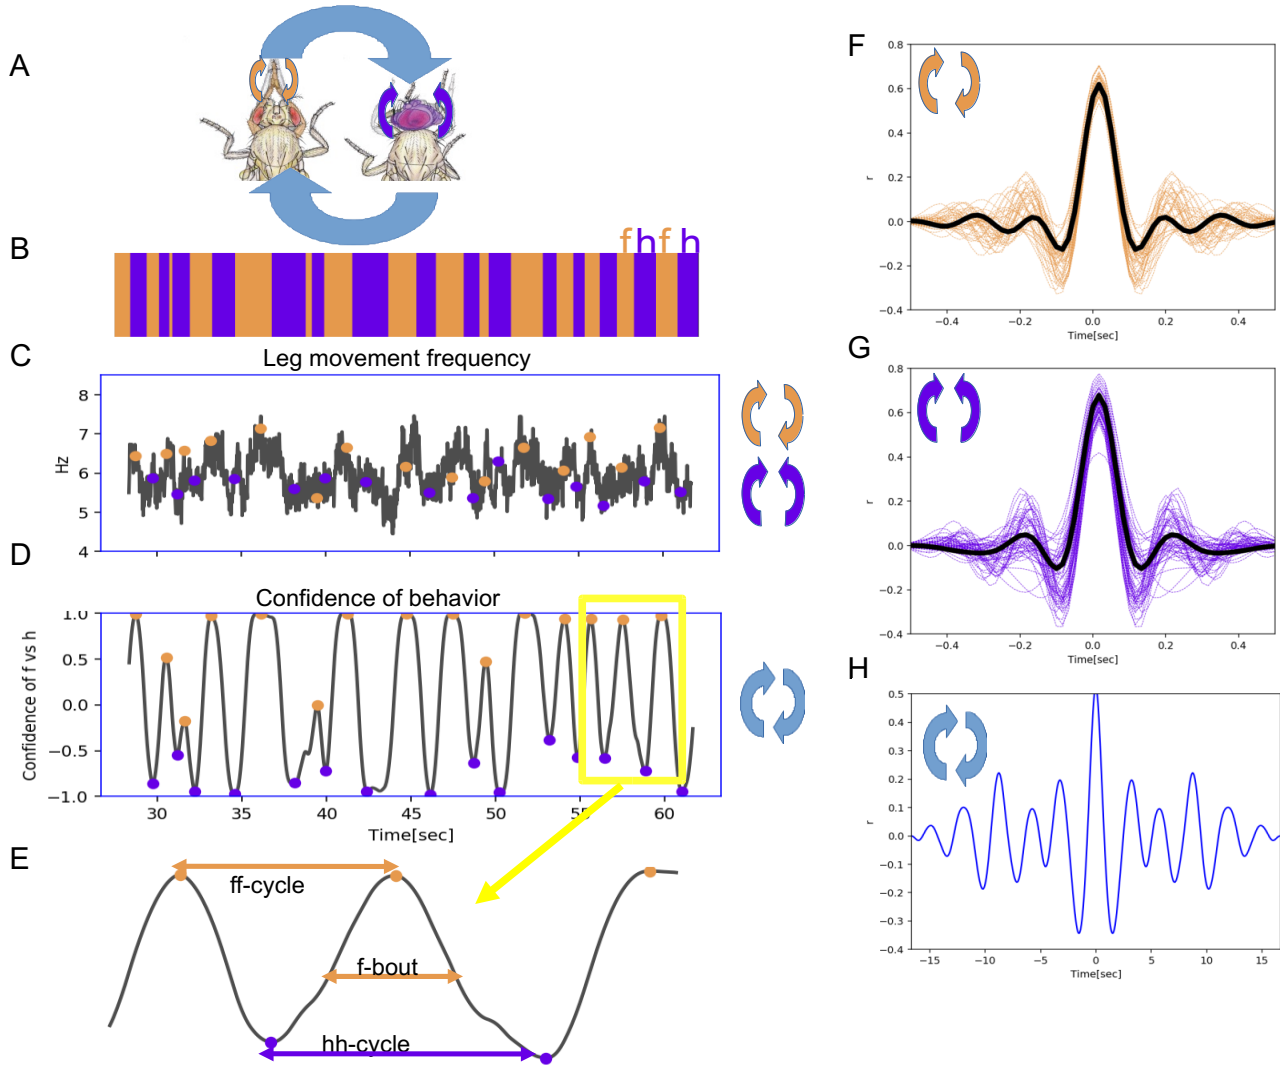

514  
515  
516

**Figure 1: Two time-scales of grooming behavior are periodic.**

517 (A) Schematic of anterior grooming behavior. The anti-parallel motion of leg rubbing is indicated by the orange arrows and  
518 parallel head cleaning movements are indicated by purple arrows (the short time-scale). The blue arrows indicate alternations  
519 between the leg rubbing and head cleaning subroutines (the long time-scale). (B) Ethogram showing alternations between  
520 bouts of front leg rubbing (f) and head cleaning (h) in dust-covered flies recorded at 18°C. (C) Example leg sweep and rub  
521 frequencies measured in the 30 seconds of anterior grooming behavior shown in the ethogram above. Purple and orange dots  
522 indicate front leg rubbing (f) and head cleaning (h) as detected by the Automatic Behavior Recognition System. (D) Bouts of  
523 front leg rubbing (f) or head cleaning (h) are identified by their probabilities (from the output of the Convolutional Neural  
524 Network). When we subtract the probability of h-bouts from that of f-bouts, we obtain the confidence of behavior curve  
525 shown here (see Methods). Purple and orange dots indicate maxima and minima of confidence in behavior identification,  
526 corresponding to the centers of the f- and h- bouts respectively. (E) Enlarged segment taken from (D) showing the definitions  
527 of ff- and hh-cycles and f-/h- bouts. (F) Samples of autocorrelation functions (ACF) computed from over 3 minutes of  
528 movies when the fly was engaged in front leg rubbing or head sweeps (G). The thick black lines indicate the average of these  
529 samples, while thinner purple and orange lines represent each individual ACF contributing to this average.; see Methods for  
530 details. (H) Autocorrelation function of the alternation of f and h bouts from the example of ff-cycles shown in D also  
531 reveals periodic signal.

532

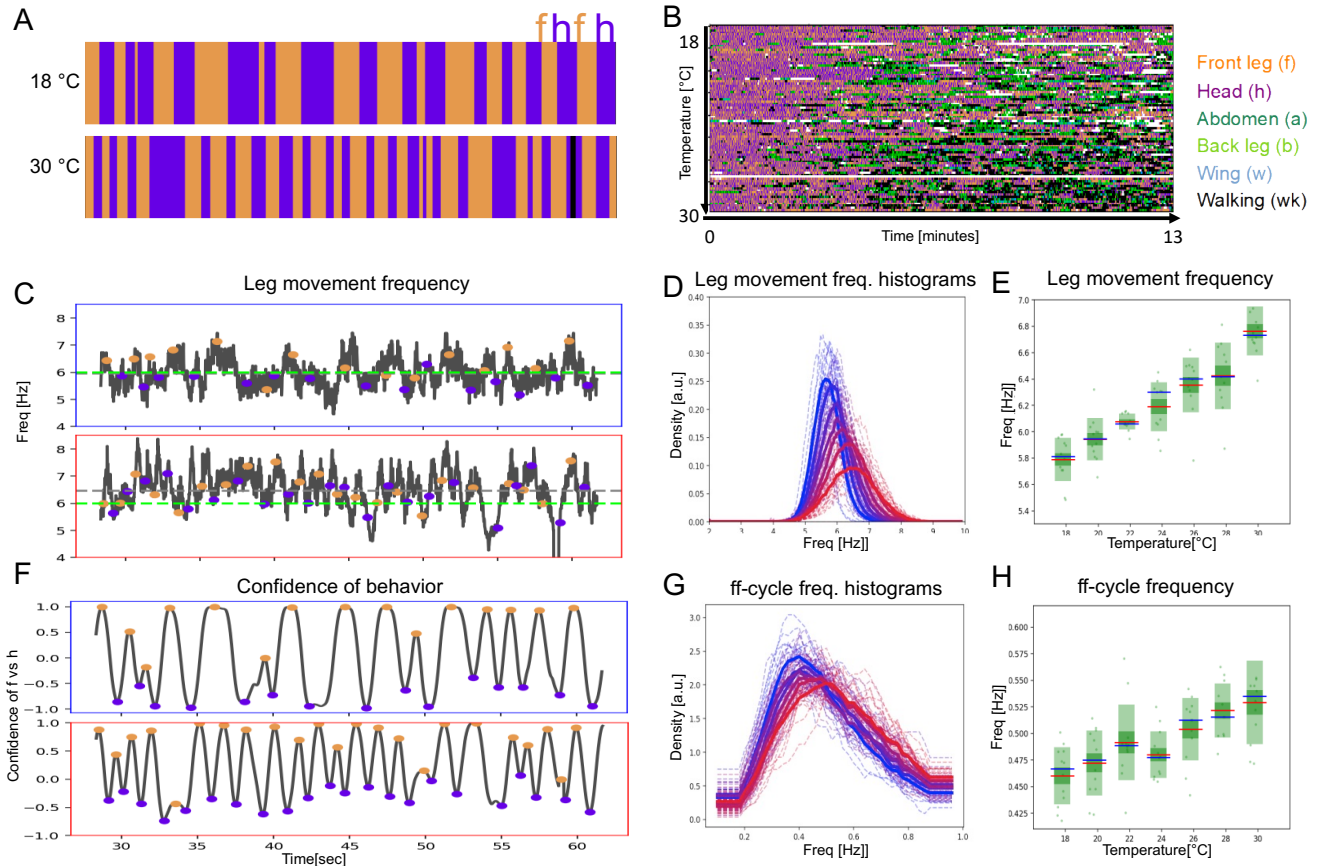

**Figure 2: Period lengths of two time-scales contract with increasing temperature in dust-stimulated flies**

533 (A) Examples of ethograms recorded at 18°C (top) and 30°C (bottom). (B) Ethograms of 84 dust-stimulated flies recorded at  
 534 different temperature (18 – 30°C). Colors represent behaviors as indicated in the color legend on the right. (C), (D), and (E)  
 535 The frequency of individual leg movements increases with temperature. (C) Shows example frequency time series from 30  
 536 seconds of grooming at 18° (top, blue outline) and 30°C (bottom, red outline). Gray dashed line = mean of this sample; green  
 537 dashed line = reference at 6 Hz. (D) Histogram of leg movement frequencies, sampled from seven temperatures (18° - 30°C.)  
 538 Lower temperatures are indicated in blue and higher ones in red. Thin lines – individual histograms; thick lines – average of  
 539 samples at each temperature. All histograms are computed from the 84 ethograms of dust-stimulated flies in (B). (E) Box  
 540 plots of leg sweep frequencies. Dots show individual fly averages, while the blue bars show the mean frequency, the red bars  
 541 mark median and the green shaded areas indicate standard deviation (SD) and error (Blue/red bars in box plots –  
 542 mean/median; shaded areas – SD and SE). (F), (G) and (H) The frequency of ff-cycles also increases with temperature. (F)  
 543 As described in **Figure 1D**, this plot shows the confidence, in samples recorded at 18°C (top) and 30°C (bottom). (G) and  
 544 (H): Similar to the panels (D) and (E) but showing the increase of ff-cycle frequency with temperature computed from the 84  
 545 dust-stimulated flies.

546  
 547 See **Supplementary Figures 1, 2, 3 and 4**

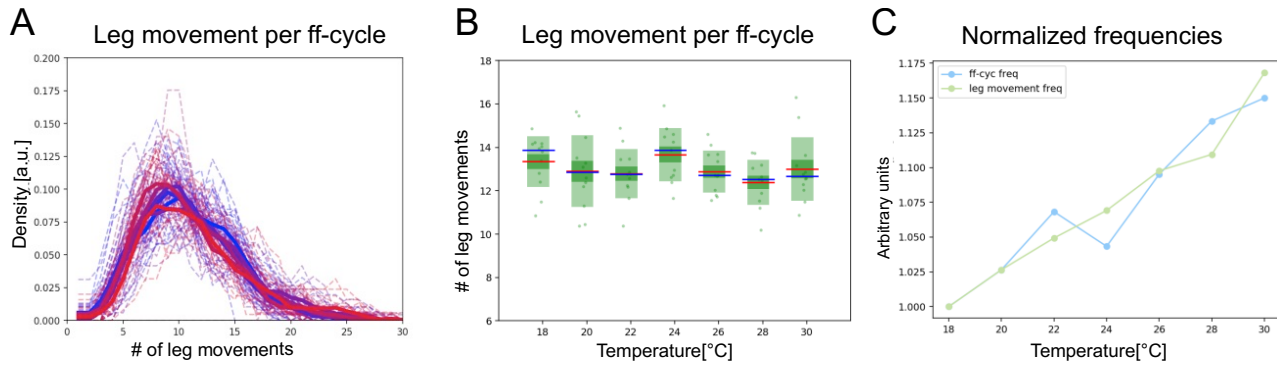

548  
549 **Figure 3: The two time-scales contract together with increasing temperature.**  
550

551 (A) Histograms of numbers of leg movements per ff-cycle in cooler temperatures (blue) and warmer temperatures (red). (B)  
552 Box plots of leg movement counts per ff-cycle across the seven temperatures; statistics as in **Figure 2E**. (C) The frequency  
553 of individual leg movements and bout alternations (ff-cycles) increases roughly linearly with temperature but over different  
554 time-scales (msec vs. sec; 7 Hz vs. 0.5 Hz). To see if they increase at the same rate, we compare them in arbitrary units.  
555 Frequencies were normalized by dividing each mean value from **Figure 2E** by the lowest value recorded: this produces the  
556 rate of change, where 1.0 means no change and values above 1.0 reflect the increased rate.

557  
558 See **Supplementary Figure 5** for similar effects in hh-cycles.

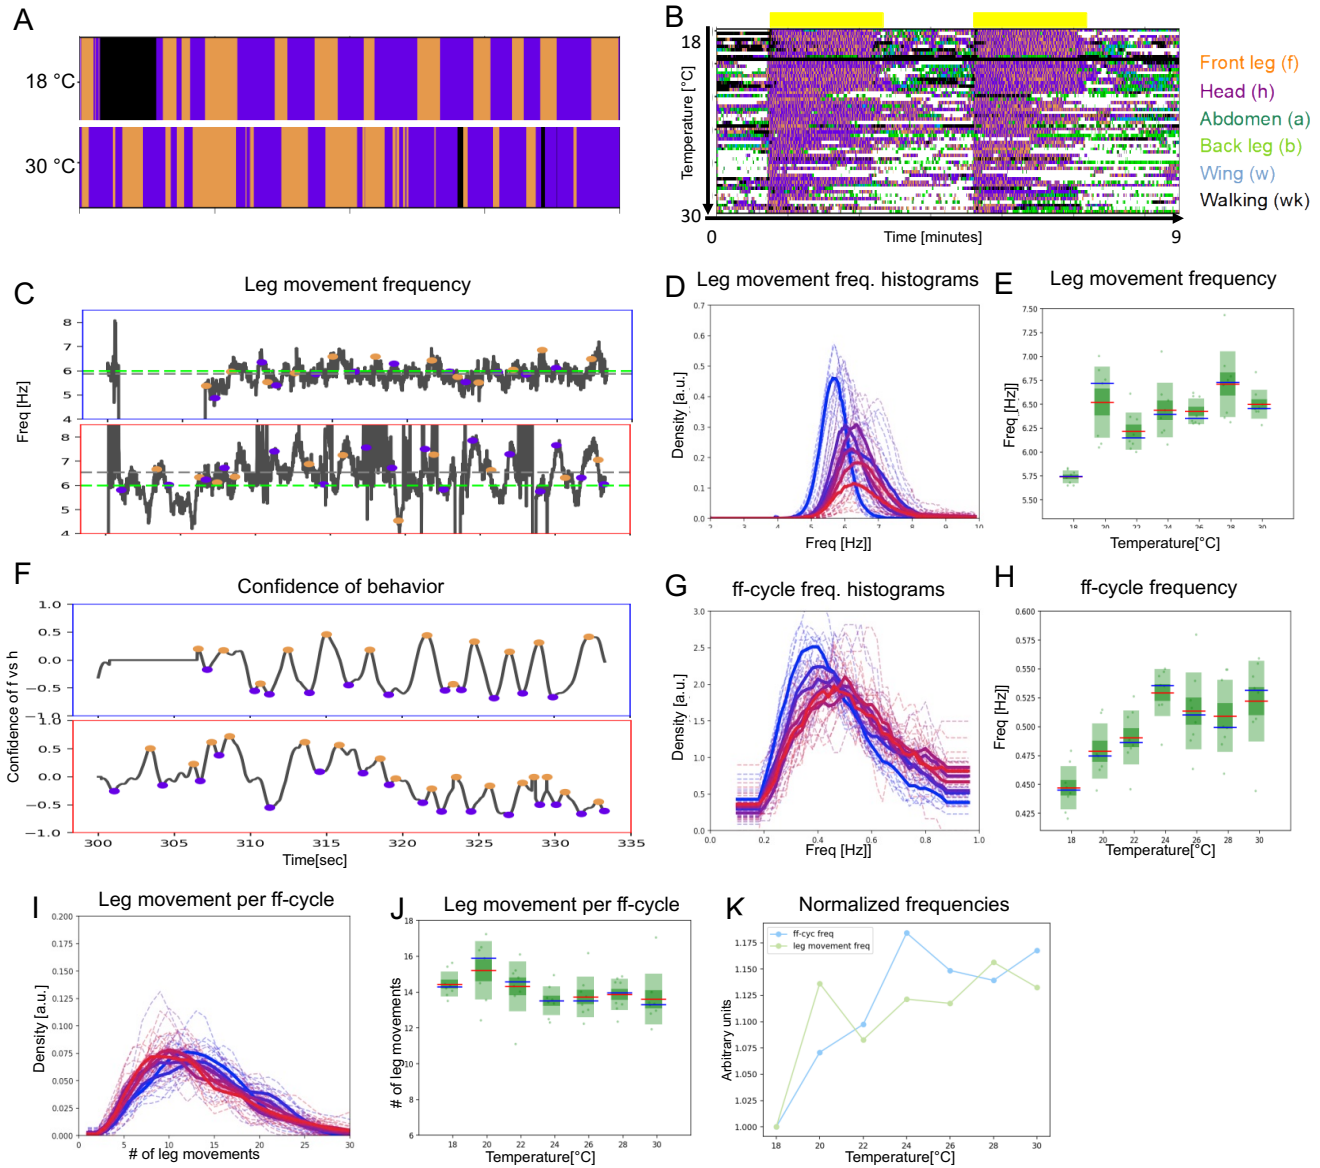

559 **Figure 4: Under constant sensory stimulation, the temperature effect on both time-scales persists**

560

561 Undusted flies expressing the optogenetic activator *UAS-Chrimson* in mechanosensory bristles were stimulated with red light  
 562 to induce anterior grooming behavior. Examples ethograms recorded at 18° (top) and 30°C (bottom) are shown in (A), while  
 563 (B) shows the whole dataset of ethograms representing 56 flies across the range of temperatures, similar to **Figure 2D**. The  
 564 yellow bars represent the periods of light activation, lasting 2 minutes each, to optogenetically induce grooming. (C)  
 565 Examples of leg movement frequencies at 18° (top) and 30°C (bottom), (D) histograms of mean frequencies at cool (blue) and  
 566 warm (red) temperatures, and (E) box plots of the increase in leg movement frequency with temperature; plots and statistics  
 567 as described in **Figure 2C, D**, and **E**; compare to short time-scale effects where grooming is induced by dust. (F, G and H)  
 568 Long-time scale ff-cycle analysis same as in **Figure 2F, G** and **H**. (I) Histograms and box plots (J) of median leg movement  
 569 counts per ff-cycle across the seven temperatures, quantified as in **Figure 3A** and **B**. (K) The rate of temperature-driven  
 570 increase in frequency is shown by normalization as in **Figure 3C**.  
 571

See **Supplementary Figure 6** for similar results on hh-cycles.



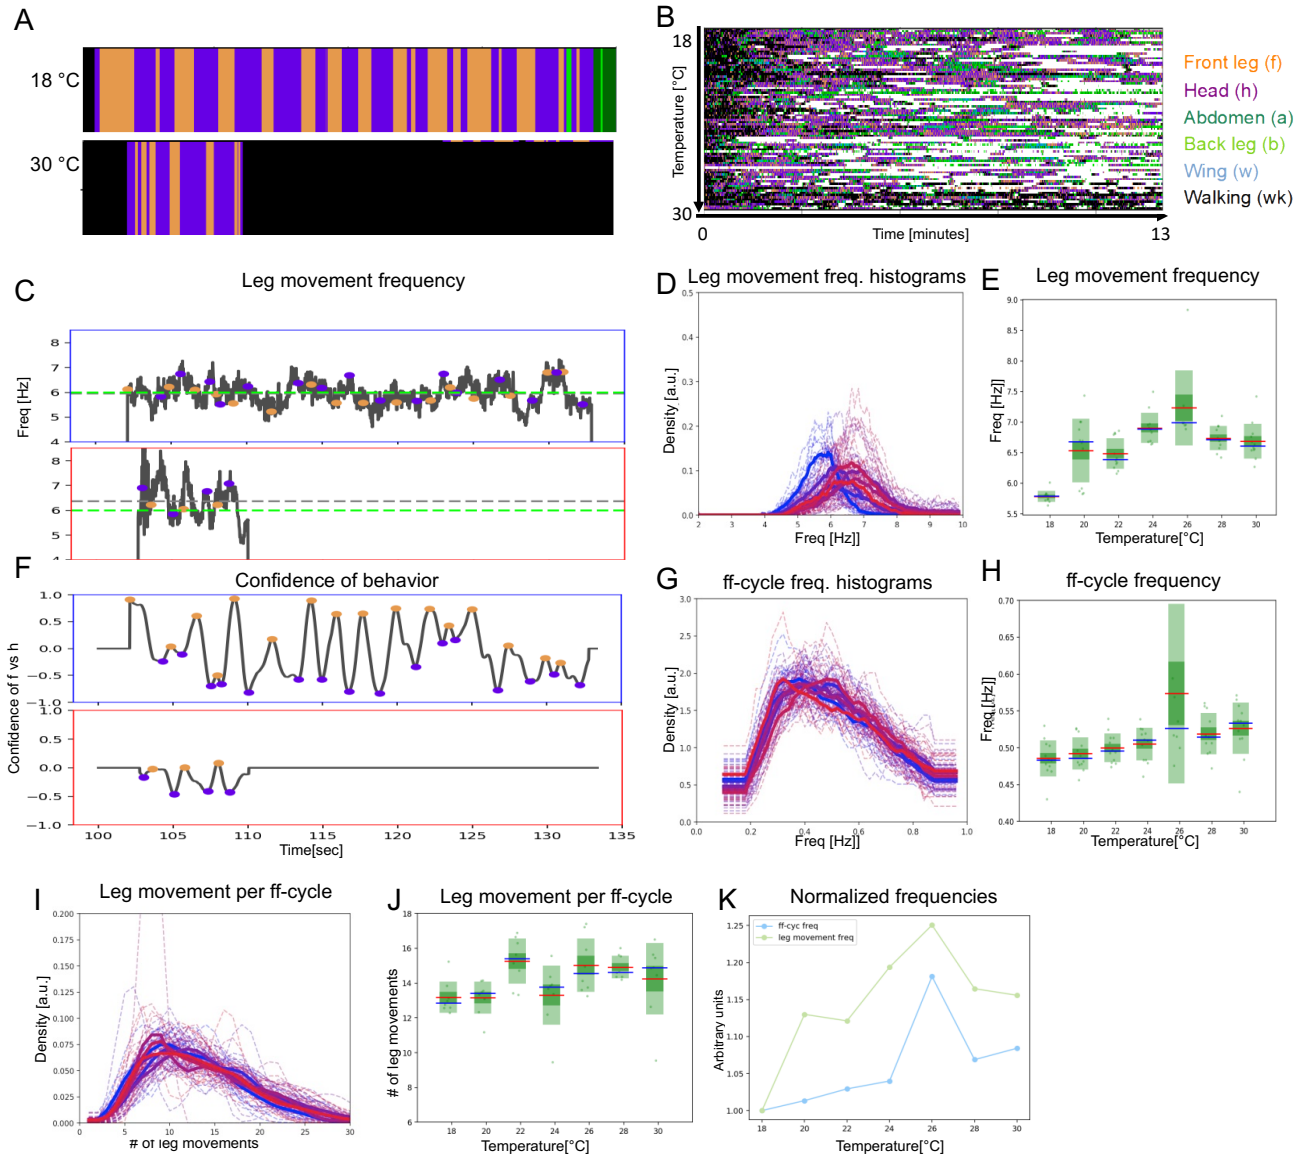

572

573

574

575

576

577

578

579

580

581

582

**Figure 5: The two time-scales of patterned movements can be decoupled in spontaneous grooming**

Spontaneous grooming was recorded in undusted flies at a range of temperatures between 18° and 30°C. Examples are shown in (A) and the whole dataset of 80 flies recorded for 13 minutes is shown in (B). (C) Examples of spontaneous leg movement frequencies at 18° (top) and 30°C (bottom), (D) histograms of mean frequencies at cool (blue) and warm (red) temperatures, and (E) box plots of the increase in leg movement frequency with temperature; plots and statistics as described in Figure 2 and 3C, D, and E; compare to short time-scale effects where grooming is induced by dust. (F, G and H) Long-time scale ff-cycle analysis comparable to Figure 2 and 3F, G and H. (I) Histograms and box plots (J) of median movement counts per ff-cycle across the seven temperatures, quantified as in Figure 3A and B. (K) The rate of temperature-driven increase in frequency is shown by normalization as in Figure 3C.

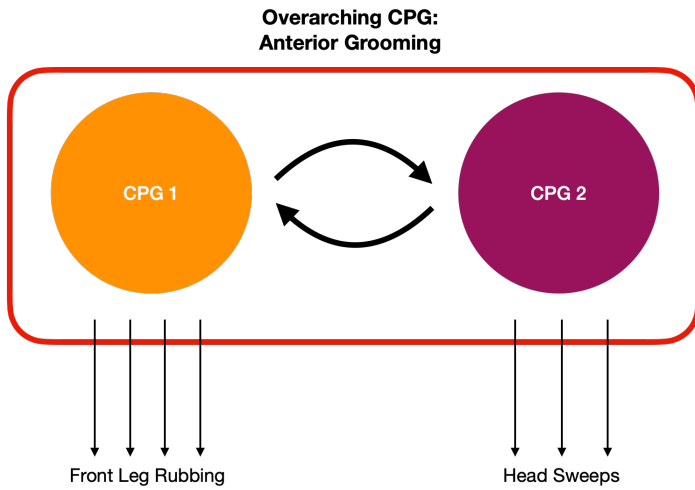

583  
584 **Figure 6: Schematic of nested CPG controlling anterior grooming behavior**  
585

586 Adapted from the concept of hierarchical CPGs shown in (Berkowitz 2019) Figure 4, this diagram illustrates how CPGs  
587 controlling individual leg rubbing and leg sweeping movements can be coordinated by an over-arching CPG controlling the  
588 alternation of front leg rubbing and head cleaning bouts. Leg rubbing occurs at slightly higher frequency than leg sweeps,  
589 indicated by the number of arrows produced by CPG 1 vs. 2 during each bout (indicated by colored circles).

590

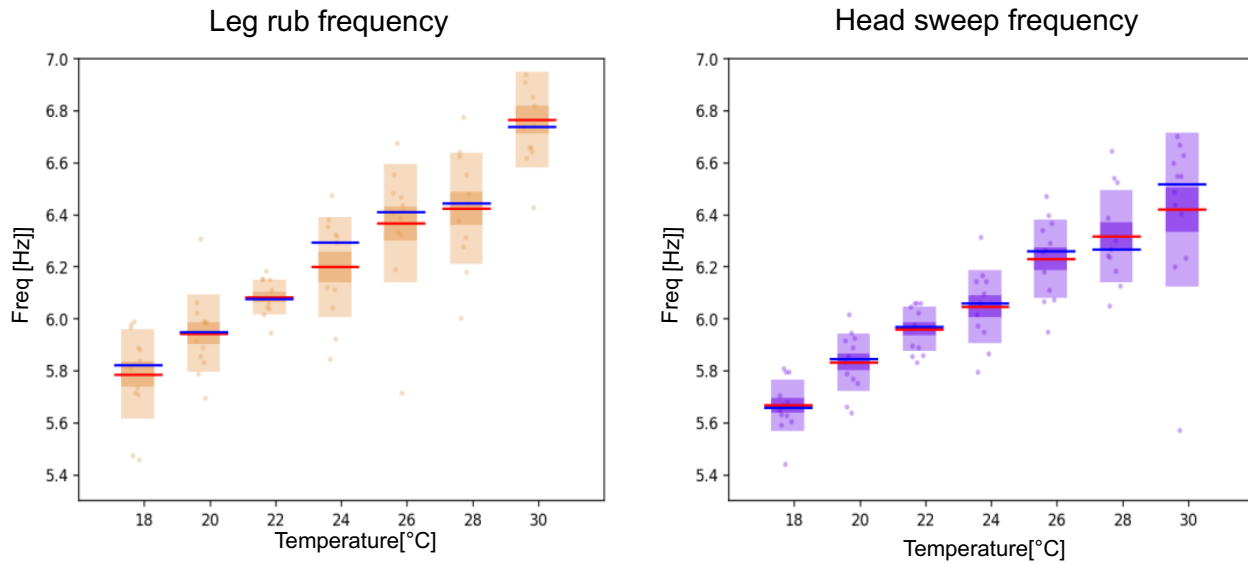

591 **Supplementary Figure 1: Frequencies of leg rubs and head sweeps increase with temperature**

592

593

594

Separating the individual leg movements into leg rubs and head sweeps shows that the frequency of both increases with temperature at a similar rate.

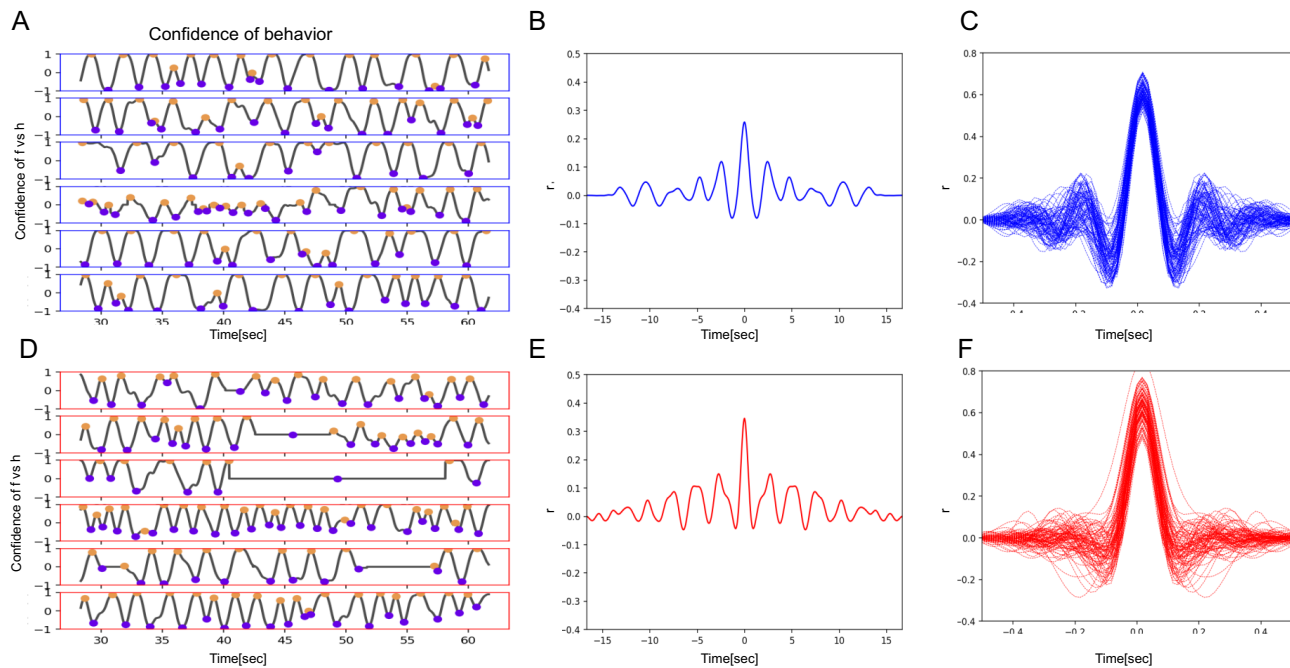

595

596

597

598

599

600

601

602

603

**Supplementary Figure 2: Bout alternations remain periodic across a range of temperatures**

(A) Samples of five flies recorded at low temperature (18°C, blue frame), showing behavior confidence curves with several ff/hh cycles. Purple and orange circles indicate the times of h- and f-peaks. (B) Autocorrelation function curves of behavior confidence sampled from 18°C flies, indicating strong periodicity of the signals (side peaks). (C) Samples of autocorrelation functions (ACF) computed from over 8 minutes of a movie when the fly was engaged in front leg rubbing or head sweeps. (D)-(F) Same as A-C but for high temperature (30°C).

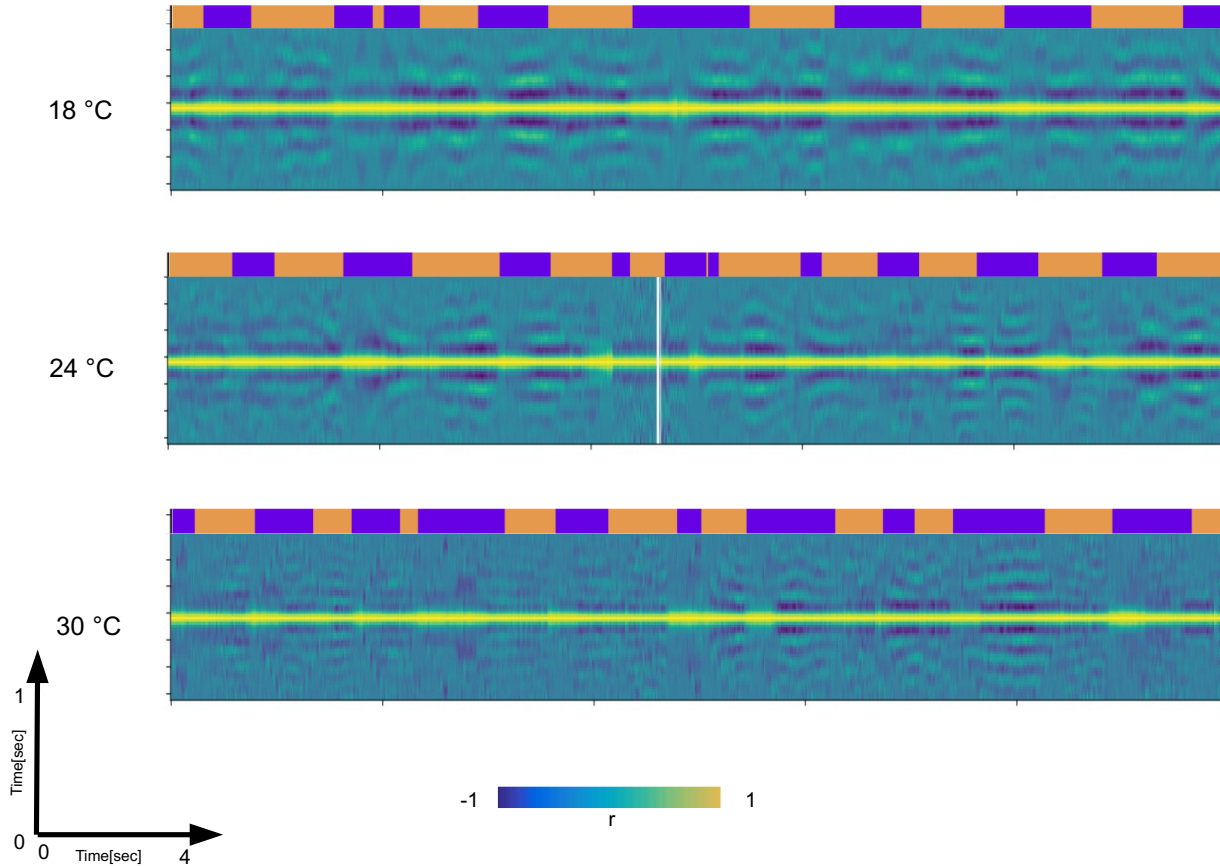

604 **Supplementary Figure 3: Autocorrelation analysis show temperature driven contraction across time-scales**

605

606 Autocorrelation functions (ACFs) computed from 0.5 sec windows of raw videos of dusted flies are stacked together as  
607 columns into matrices across ~17 seconds of a movie. Each matrix is showing the change of ACF shape across the ~17  
608 seconds. Note the modulation of the side-band positions and their numbers which is reflective of frequency modulation on  
609 the short time-scale (y-axis). Also note the modulation of the longer time-scales (x-axis). The three matrices shown are taken  
610 from different temperatures. Note that at the highest temperature the y-axis becomes “denser” (more side-bands) and that the  
611 episodes of harmonic bouts become shorter (x-axis). This way we can observe simultaneous transformation of x-axis and the  
612 y-axis as a result of temperature increase. The ethograms on top of the matrices are used as a reference.

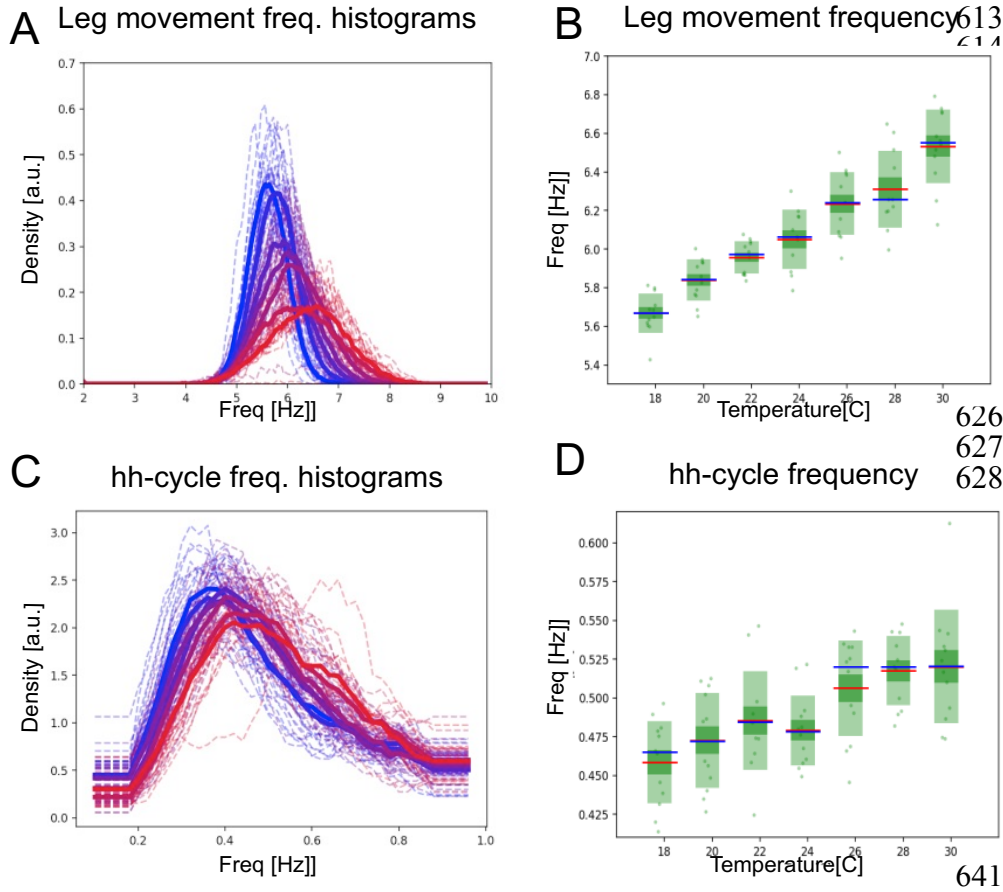

642 **Supplementary Figure 4: The hh-cycles also contract with increasing temperature**

643

644 (A) Histograms of mean frequencies at cool (blue) and warm (red) temperatures, and (B) box plots of the increase in leg  
 645 movement frequency with temperature; plots and statistics as described in Figure 2C, D, and E. (C) Long-time scale hh-  
 646 cycle analysis comparable to Figure 2 and 3 G and H.

647

648

649

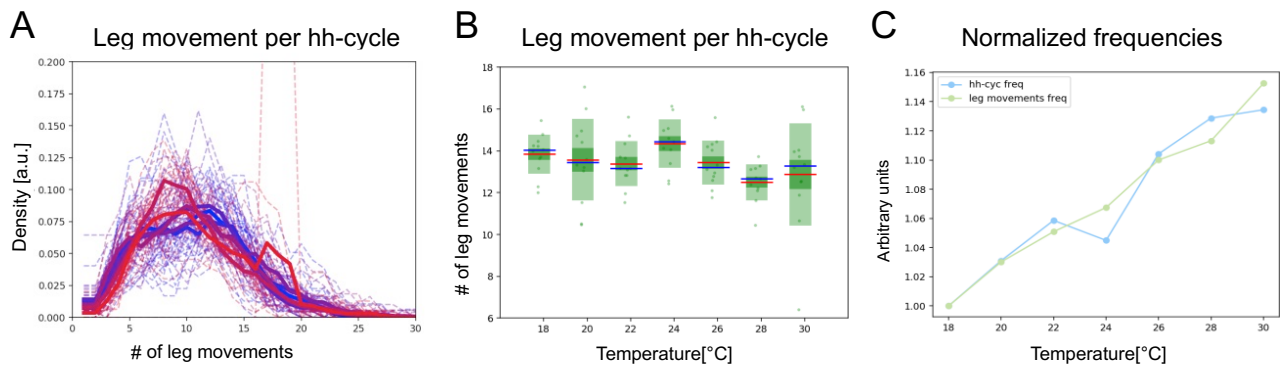

650

651 **Supplementary Figure 5: Head sweeps and hh-cycles contract at the same rate as temperature increases**

652

653 (A) Histograms of numbers of leg movements per hh-cycle in cooler temperatures (blue) and warmer temperatures (red). (B)  
 654 Box plots of leg movement counts per hh-cycle across the seven temperatures; statistics as in Figure 2E. (C) The frequency  
 655 of individual leg movements and bout alternations (hh-cycles) increases roughly linearly with temperature but over different  
 656 time-scales (msec vs. sec; 7Hz vs. 0.5Hz).

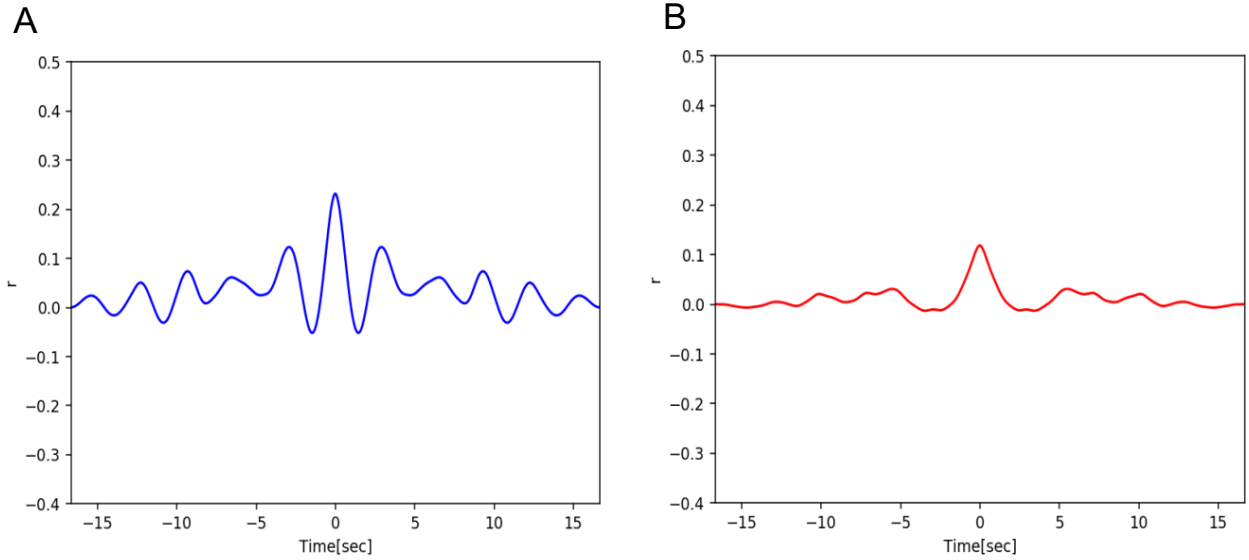

657  
658  
659  
660  
661  
662  
663  
664

**Supplementary Figure 6: Bout alternations remain periodic across a range of temperatures in optogenetically-stimulated flies**

(A) Autocorrelation function curves of behavior confidence sampled from 18°C flies, indicating strong periodicity of the signals (side peaks). (B) Same as A but for high temperature (30°C). The autocorrelations here are lower than in A, however side-peaks remain.
